# Supplementary material
Source: publisher figshare collection journal article supplement (https://frontiersin.figshare.com/ndownloader/files/26579141)
Supplement: Supplementary file [file 26579141]

## Supplementary Material

### Mutations of N1 Riboswitch Affect its Dynamics and Recognition by Neomycin Through Conformational Selection

Piotr Chyży<sup>1,2</sup>, Marta Kulik<sup>1,3,\*</sup>, Suyong Re<sup>4,5</sup>, Yuji Sugita<sup>4,6,7</sup> and Joanna Trylska<sup>1</sup>

<sup>1</sup>Centre of New Technologies, University of Warsaw, Warsaw, Poland

<sup>2</sup>Faculty of Physics, University of Warsaw, Warsaw, Poland

<sup>3</sup>Biological and Chemical Research Centre, Department of Chemistry, University of Warsaw, Warsaw, Poland

<sup>4</sup>RIKEN Center for Biosystems Dynamics Research (BDR), Kobe, Japan

<sup>5</sup>National Institutes of Biomedical Innovation, Health and Nutrition, Ibaraki, Japan

<sup>6</sup>RIKEN Cluster for Pioneering Research (CPR), Wako, Japan

<sup>7</sup>RIKEN Center for Computational Science, Kobe, Japan

Correspondence\*: m.kulik@uw.edu.pl

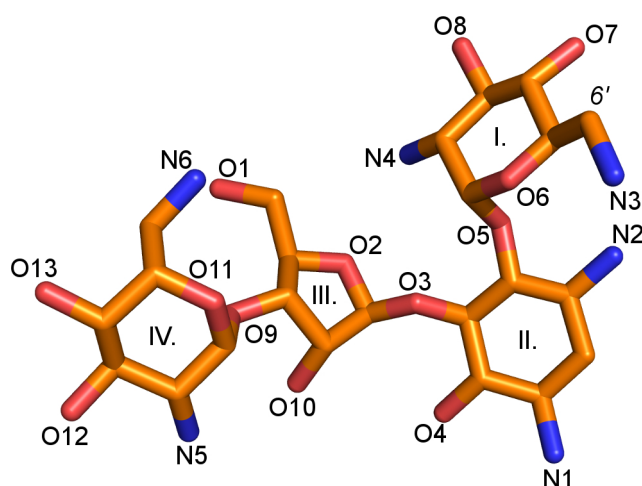

**Figure S1.** The structure of neomycin. The numbering of the rings is shown inside the rings. Atom names are given according to the Amber naming scheme. The highlighted 6'-carbon atom indicates the position of the functional group that was modified to obtain neomycin from paromomycin.

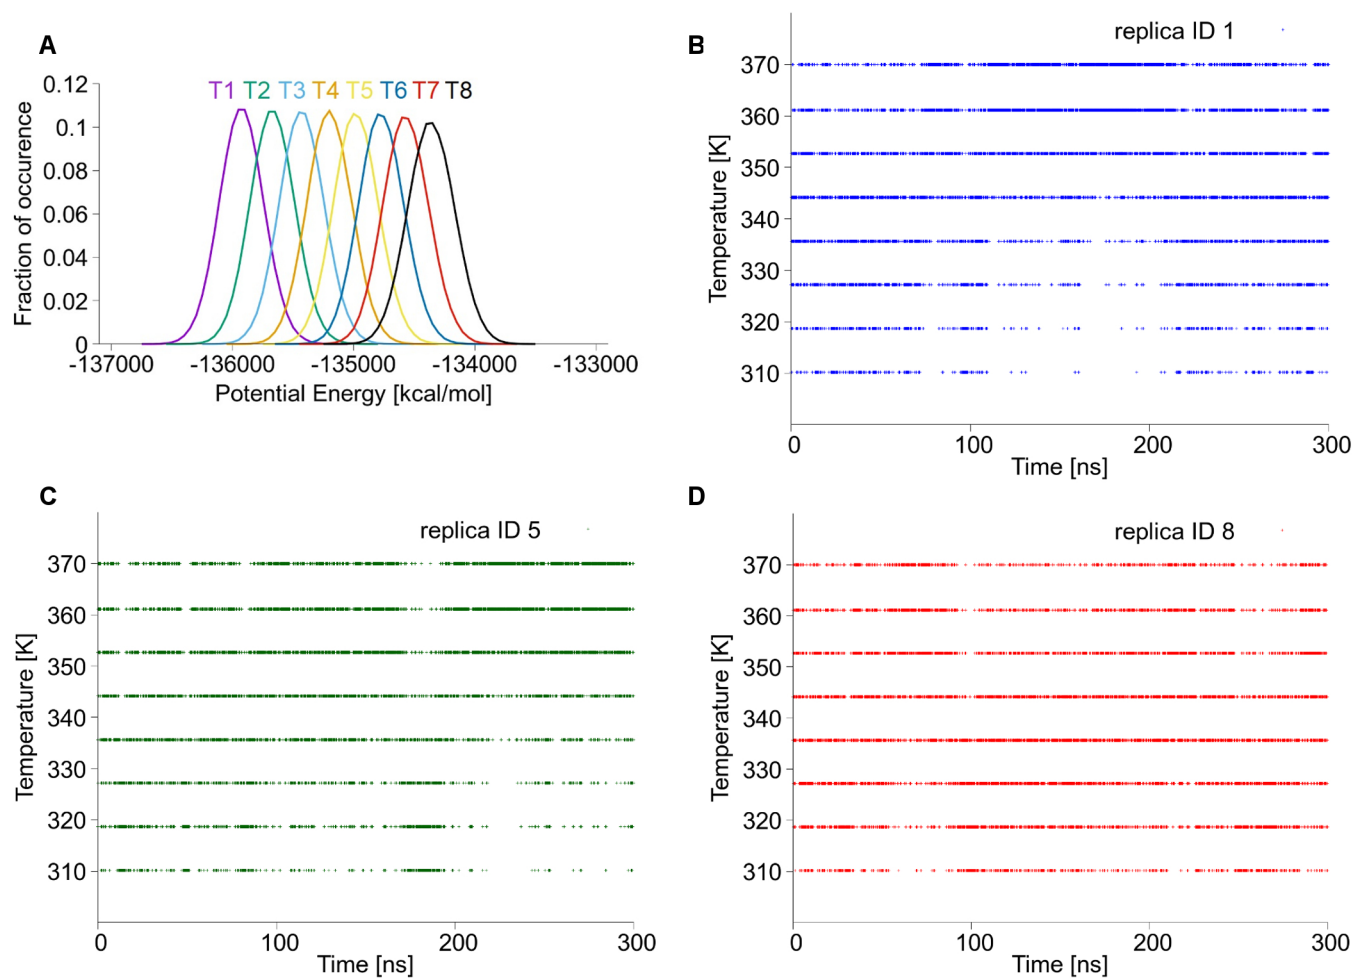

**Figure S2.** Sampling in the gREST simulation of the N1\_NEO riboswitch. (A) Distribution of the potential energy of the solute at different temperatures T1, T2, ..., T8. The random walk in the temperature space shown for replica 1 (B), replica 5 (C) and replica 8 (D).

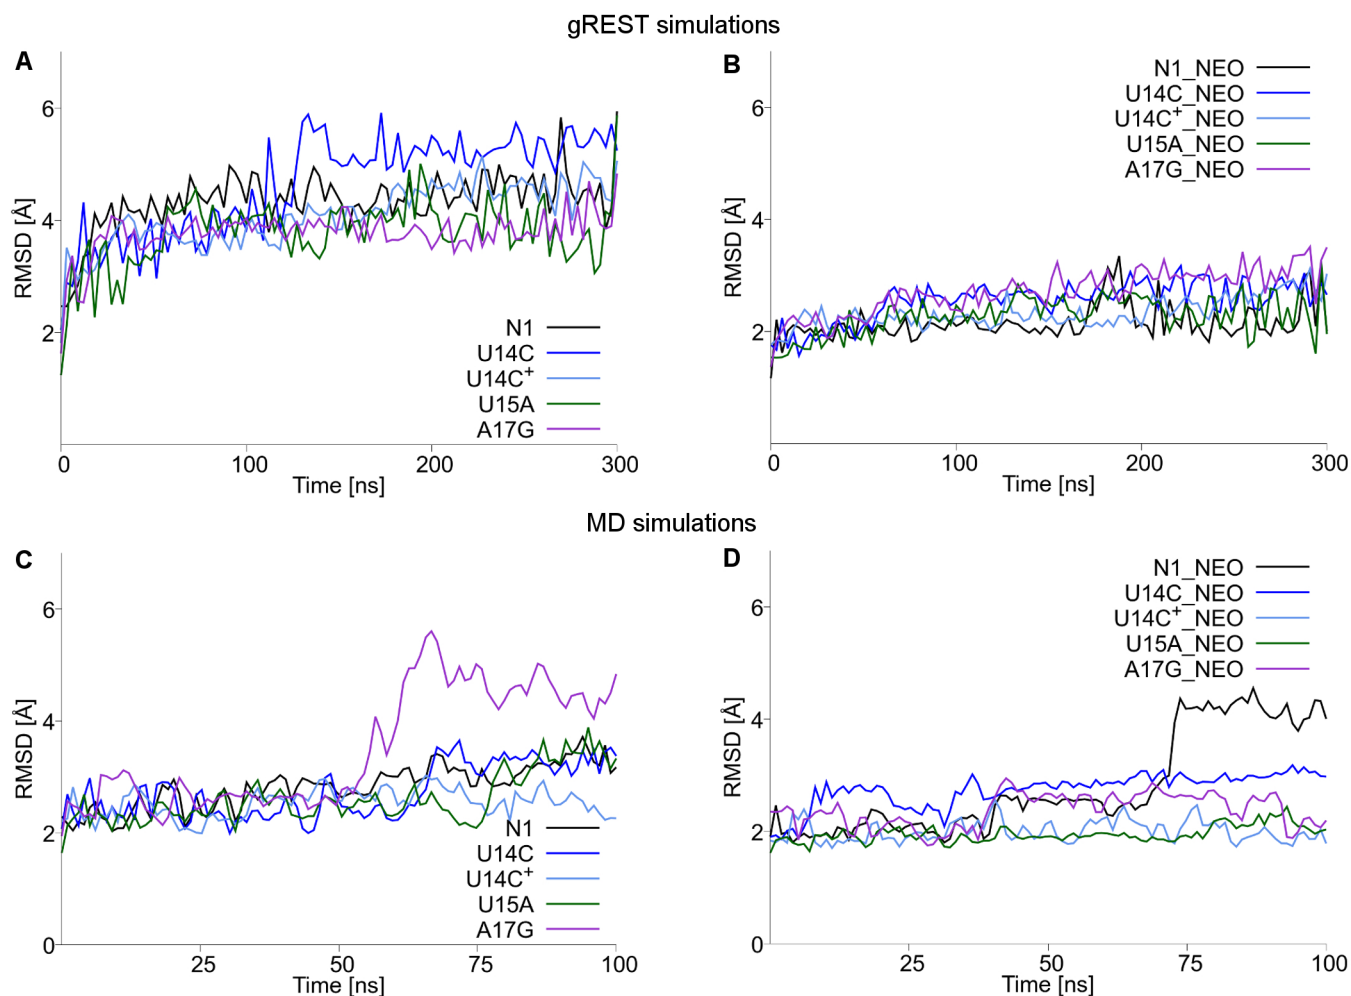

**Figure S3.** RMSD values for the RNA non-hydrogen atoms of the unbound (A) and bound (B) systems in gREST and the unbound (C) and bound (D) systems in MD. The gaussian\_filter1d method was used to smooth the data.

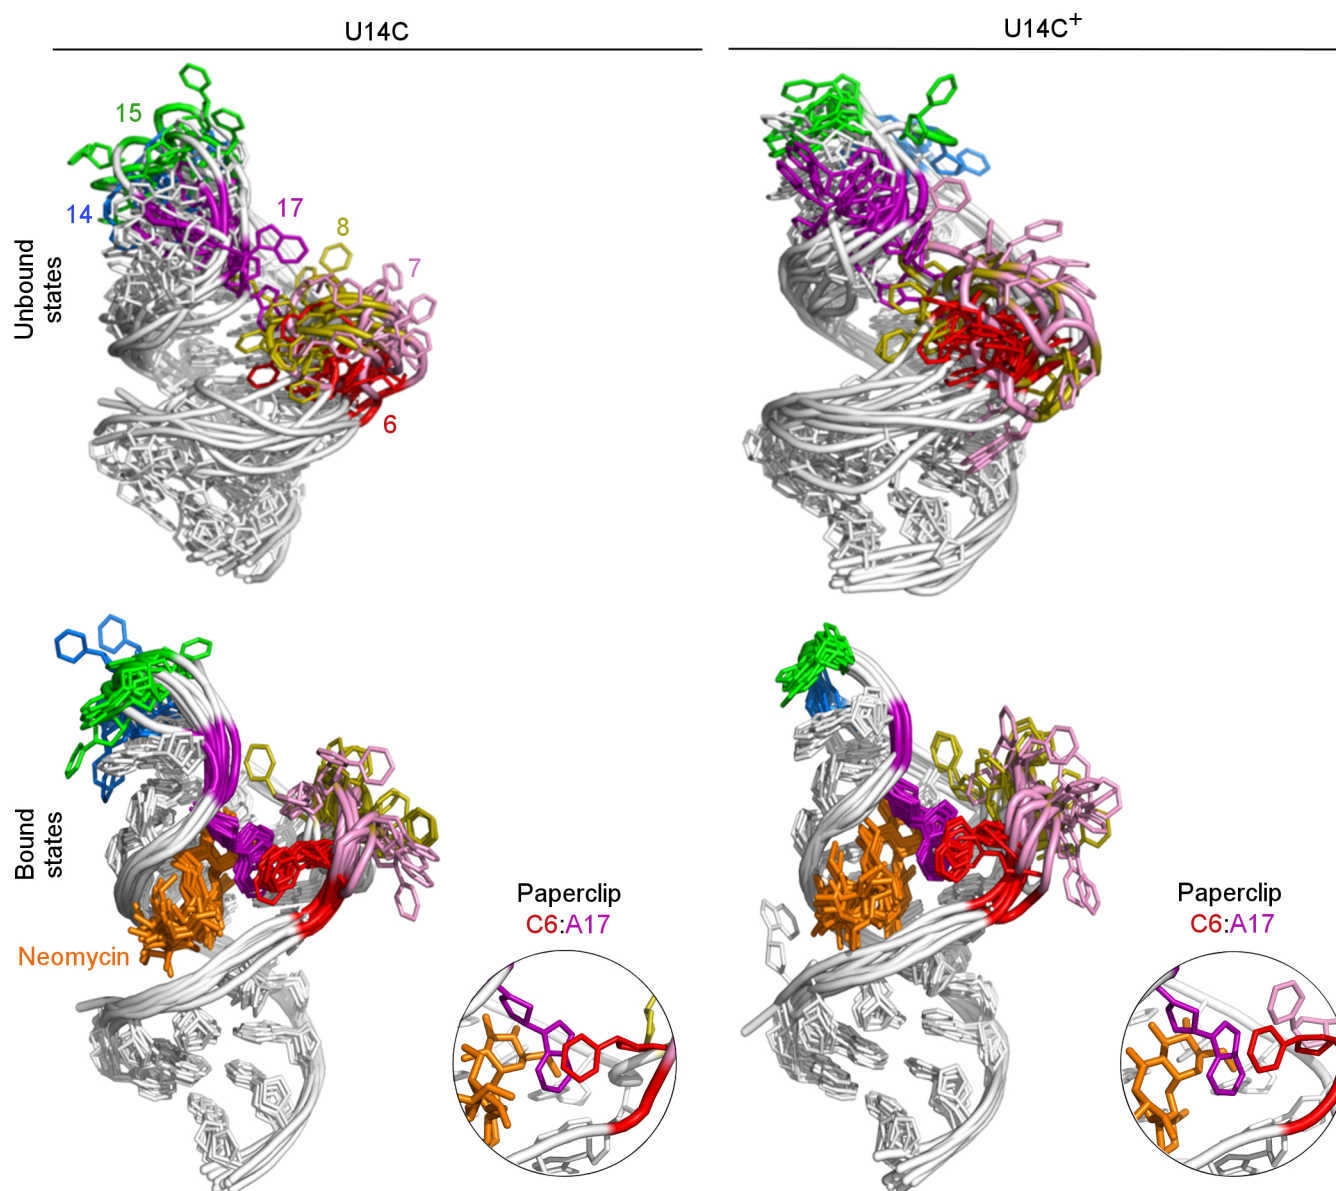

**Figure S4.** Superposition with respect to phosphorus atoms of 10 representative structures from clustering for U14C and U14C<sup>+</sup> simulations. The paperclips – the Van der Waals interactions between the bulge and apical loop seen in at least 25% of simulation frames – are shown in the insets for cluster representants.



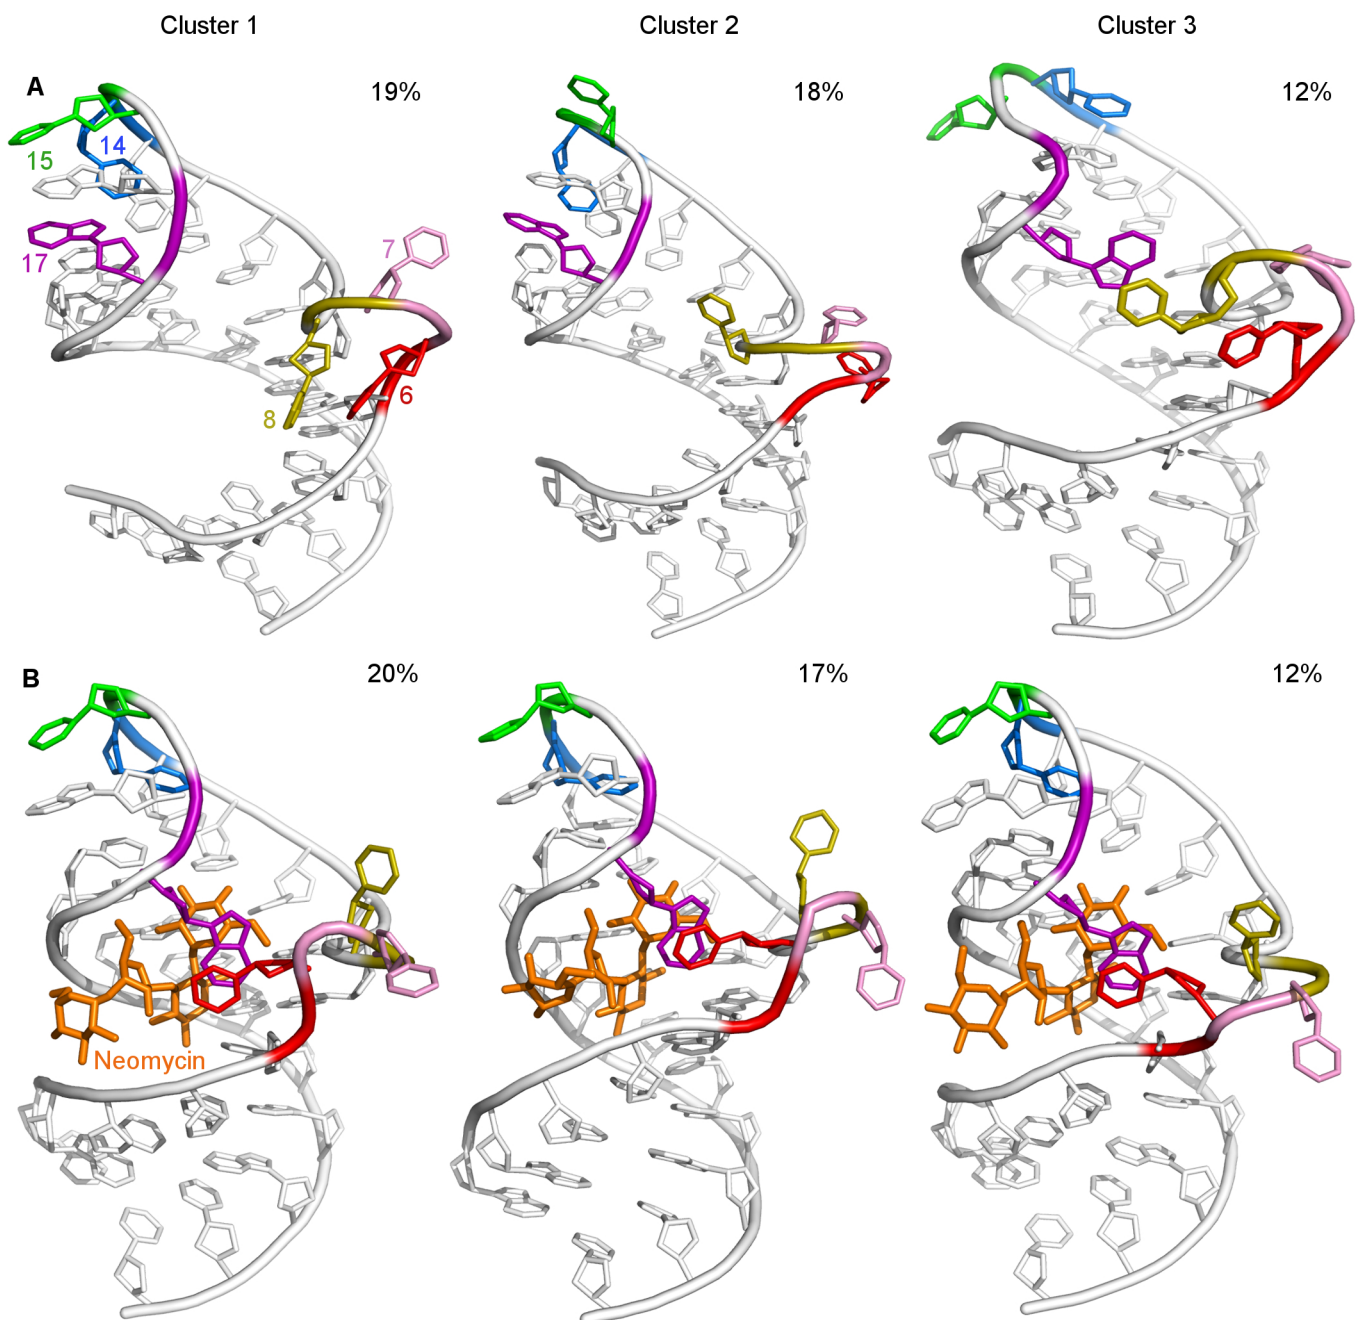

**Figure S5.** The representative structures of three most populated structural clusters in the N1 riboswitch: (A) unbound state, (B) bound state. Next to each structure, the percentage of occurrence in the analyzed trajectory is shown.

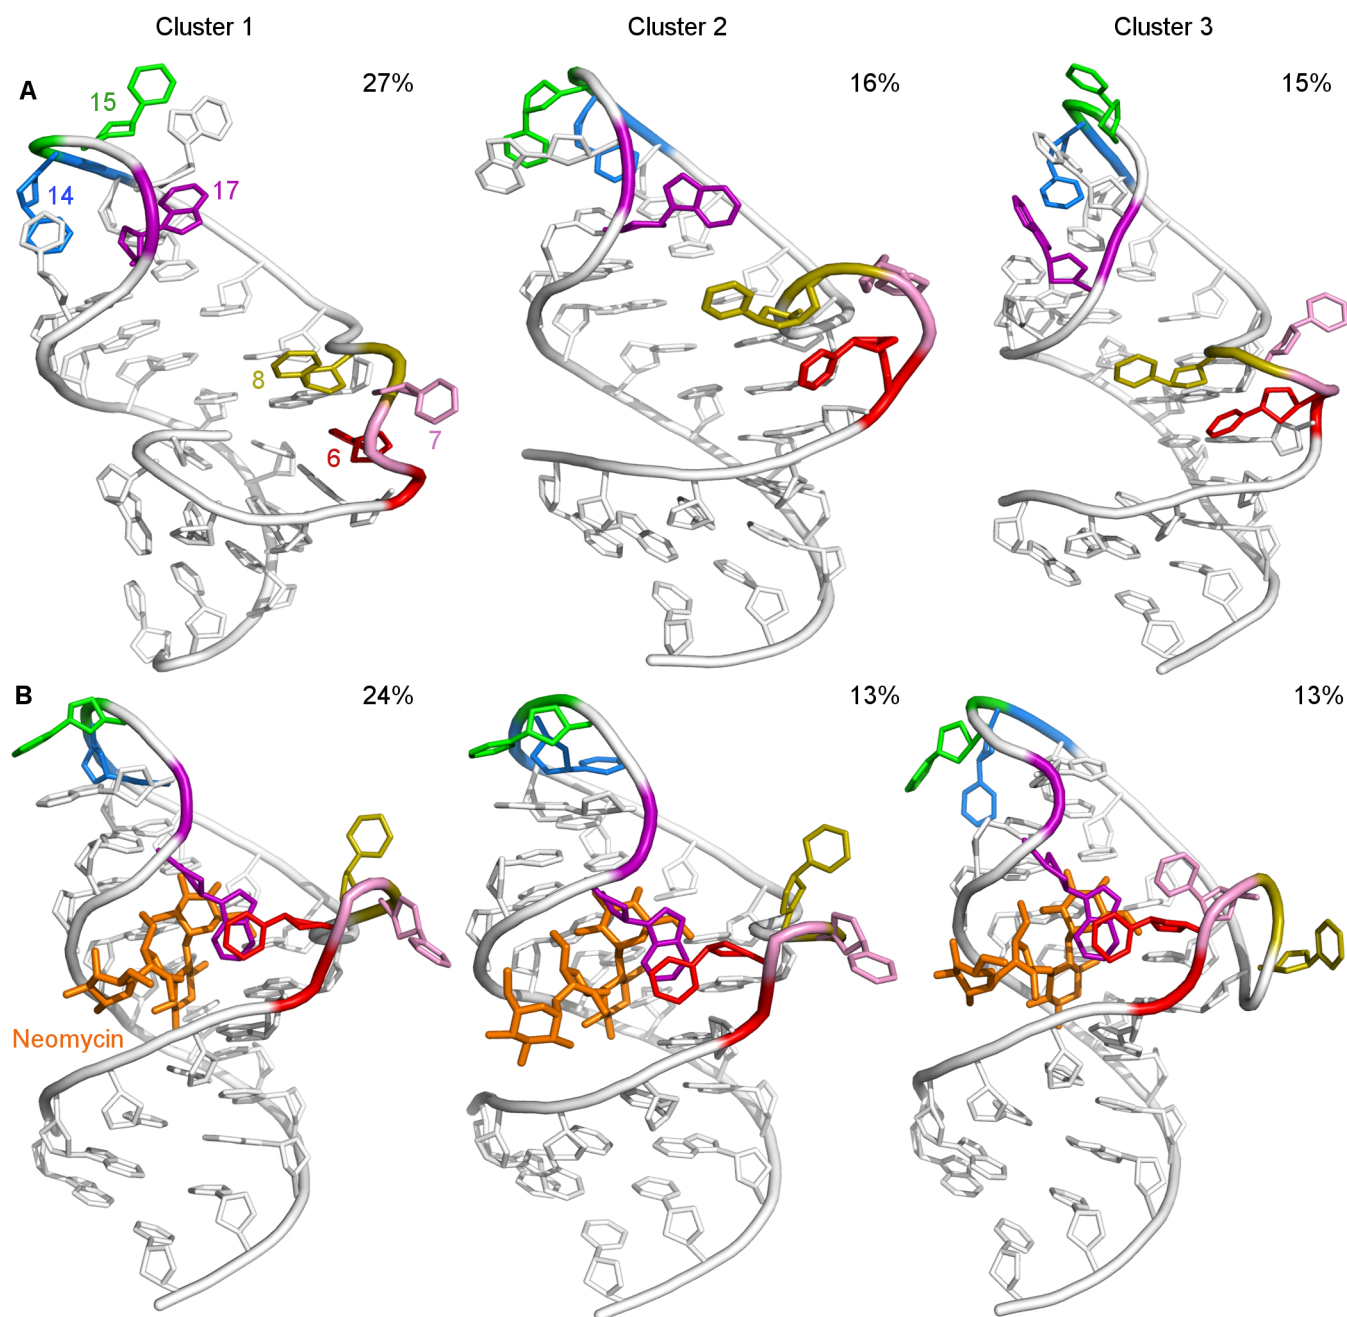

**Figure S6.** The representative structures of three most populated structural clusters in the U14C riboswitch: (A) unbound state, (B) bound state. Next to each structure, the percentage of occurrence in the analyzed trajectory is shown.

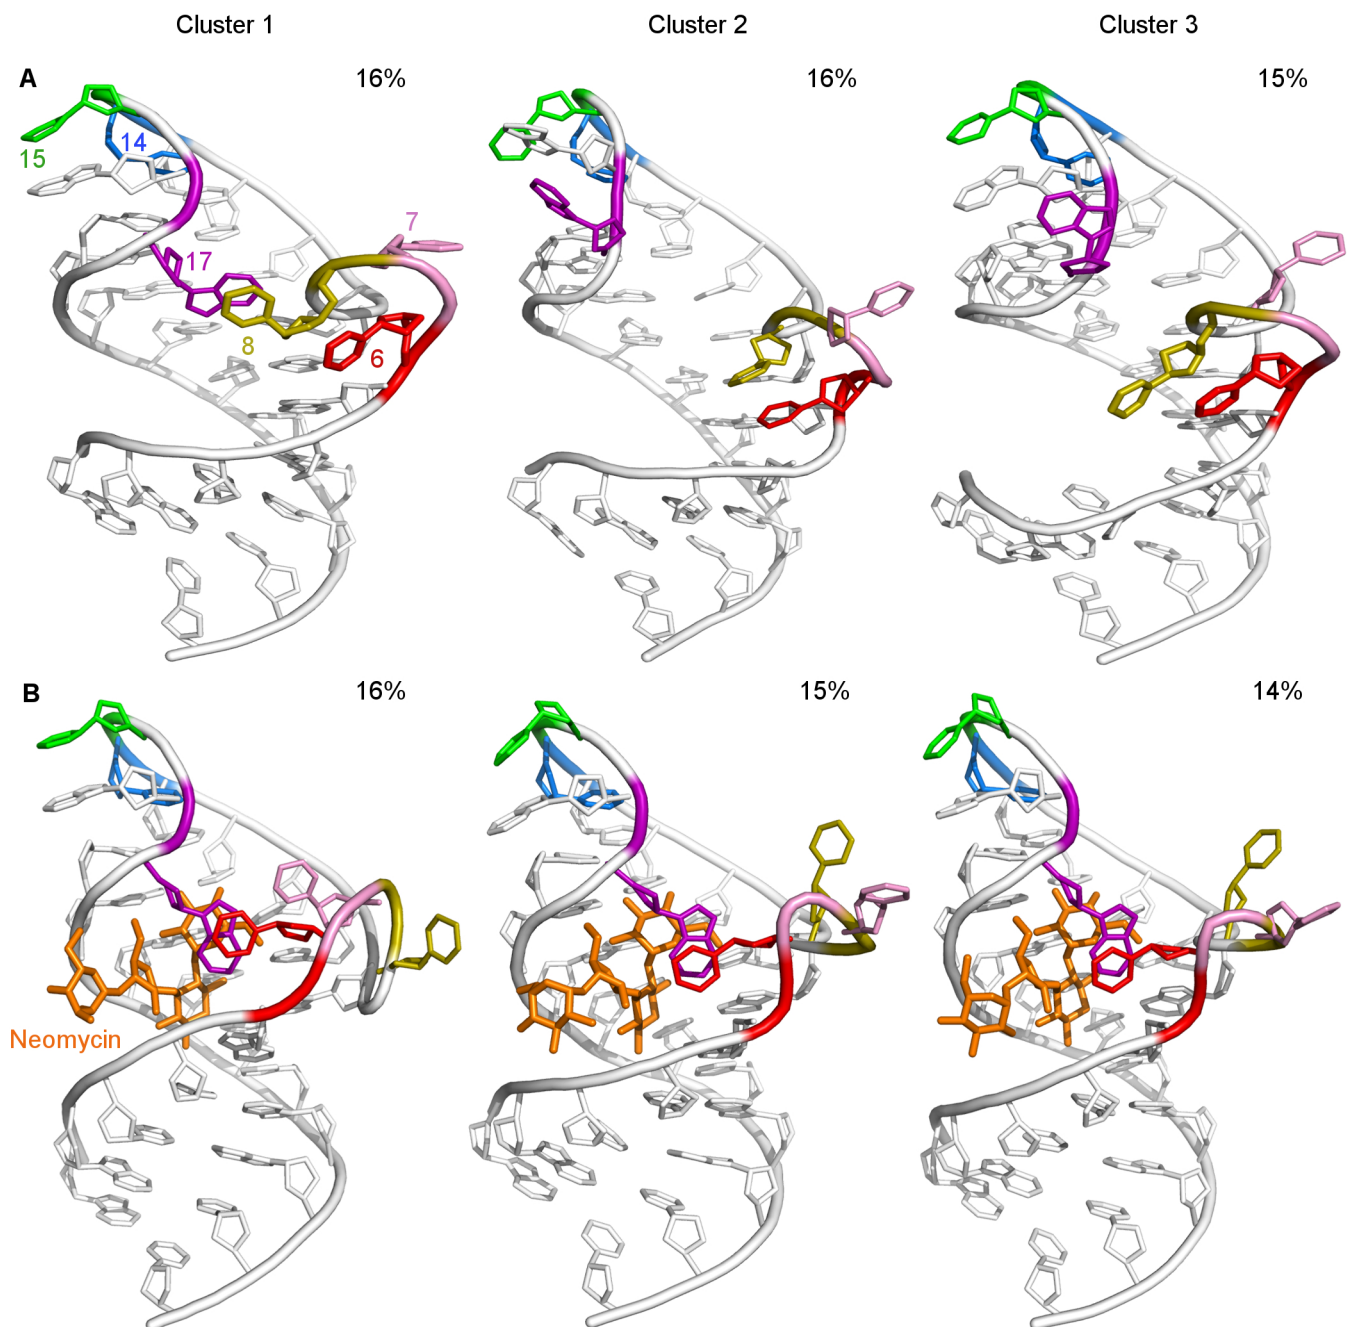

**Figure S7.** The representative structures of three most populated structural clusters in the U14C<sup>+</sup> riboswitch: (A) unbound state, (B) bound state. Next to each structure, the percentage of occurrence in the analyzed trajectory is shown.



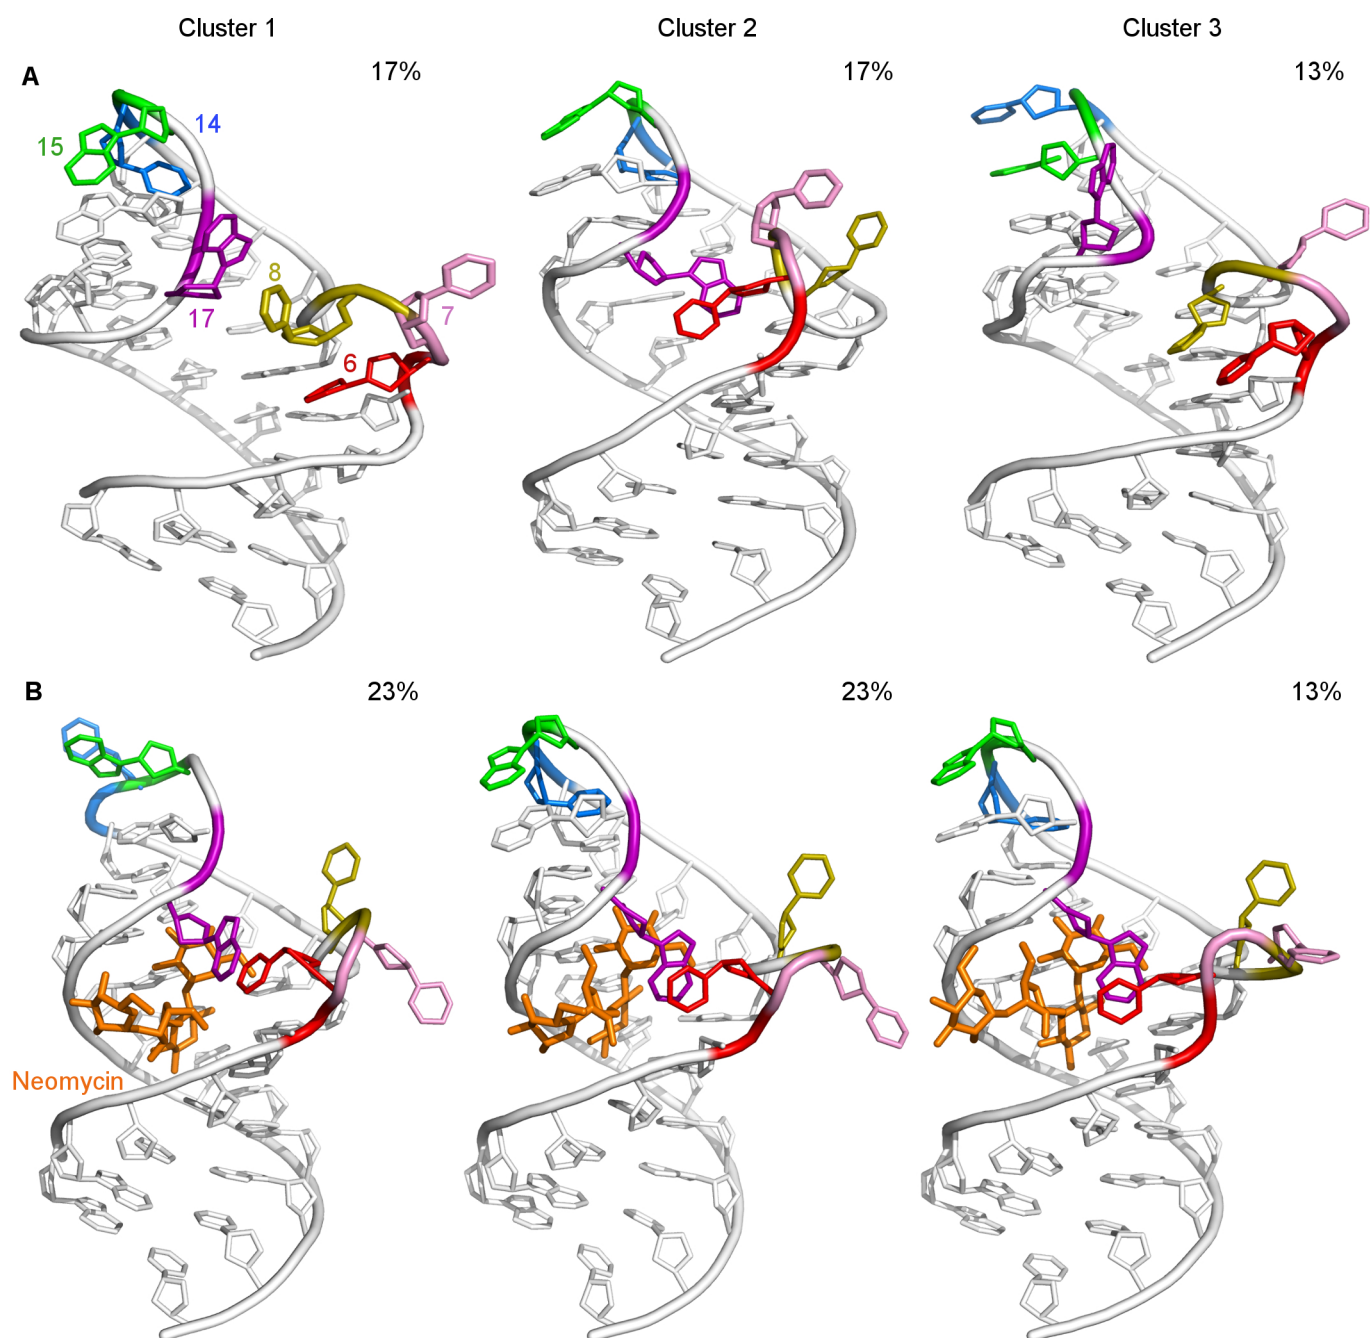

**Figure S8.** The representative structures of three most populated structural clusters in the U15A riboswitch: (A) unbound state, (B) bound state. Next to each structure, the percentage of occurrence in the analyzed trajectory is shown.

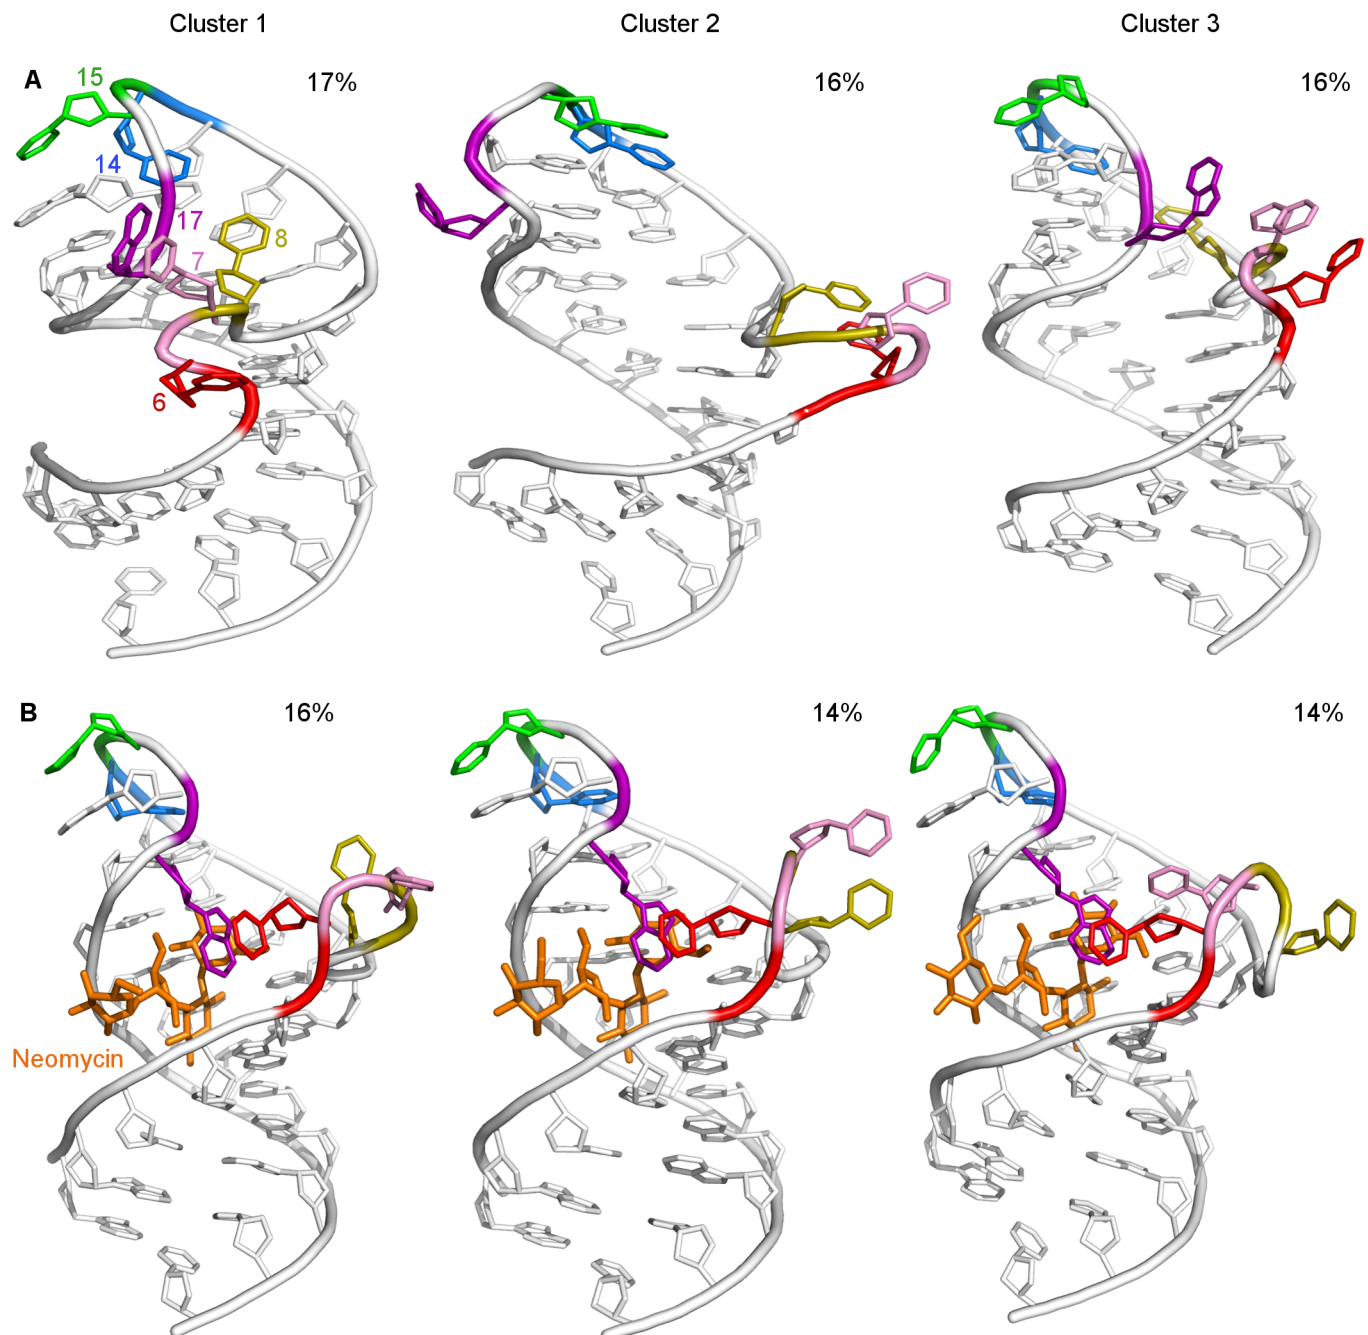

**Figure S9.** The representative structures of three most populated structural clusters in the A17G riboswitch: (A) unbound state, (B) bound state. Next to each structure, the percentage of occurrence in the analyzed trajectory is shown.

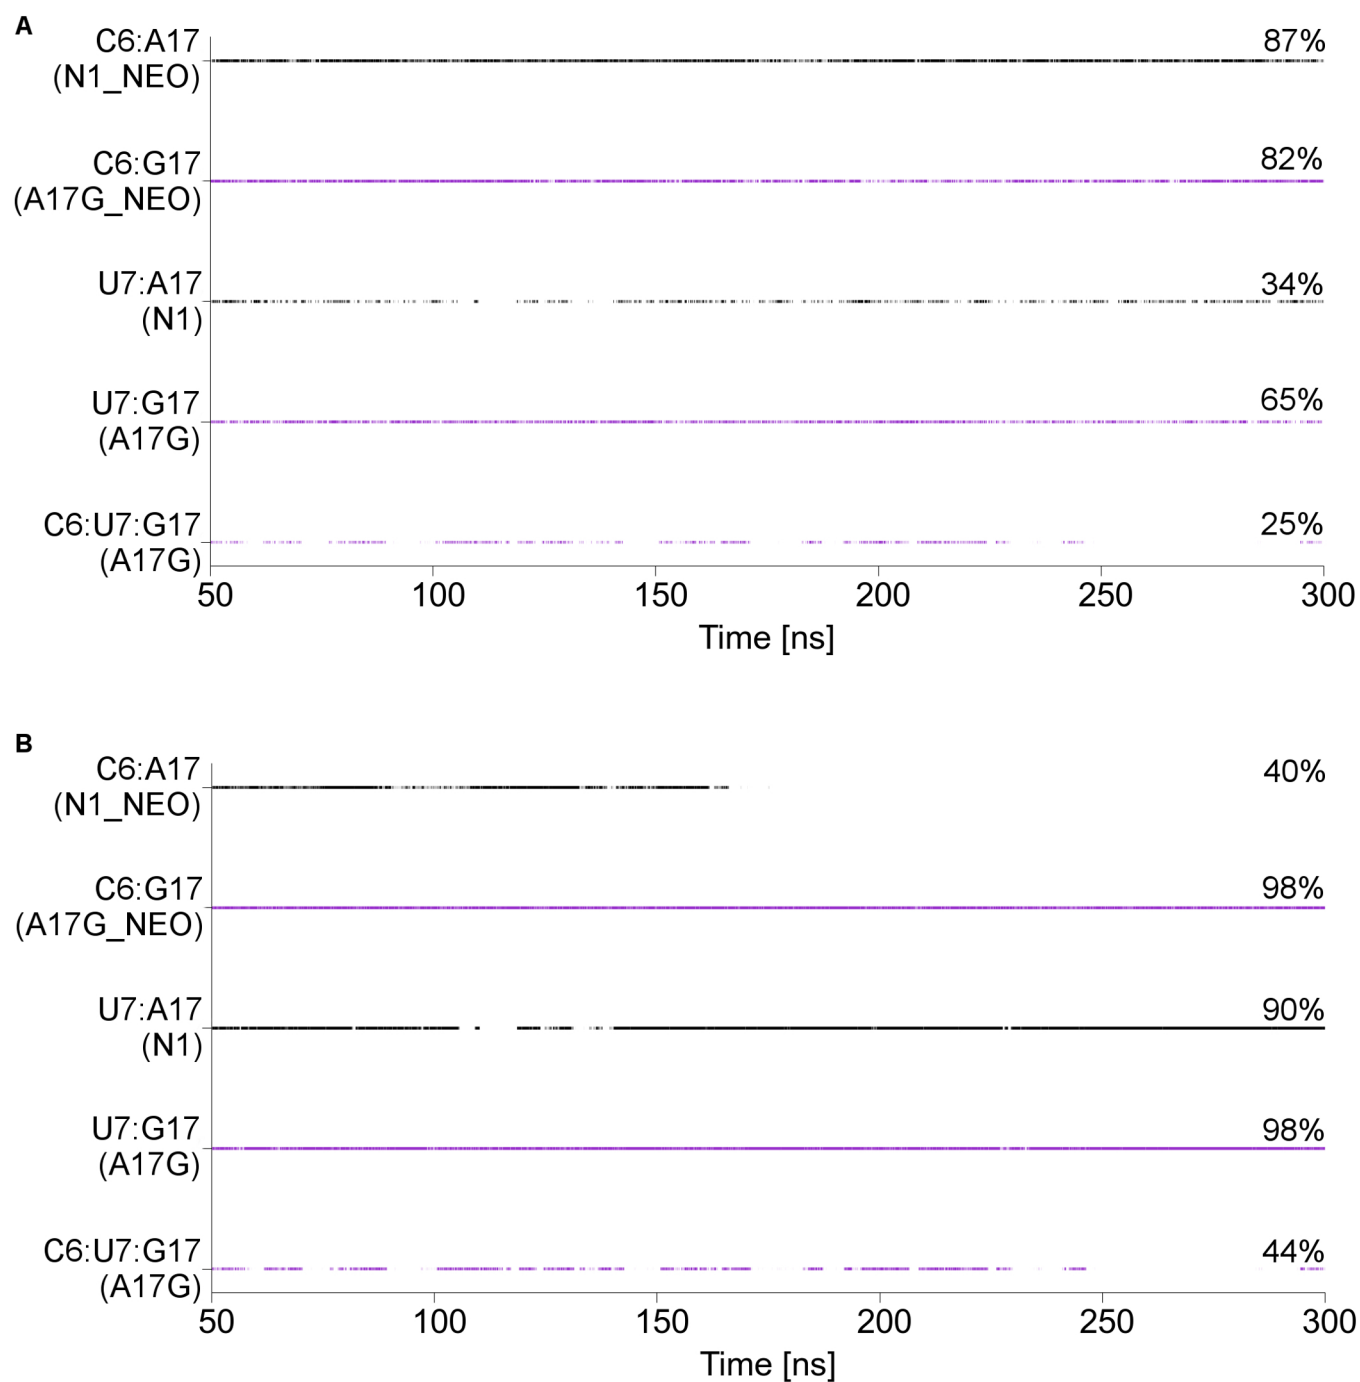

**Figure S10.** The paperclip interactions created and broken in the time course of the N1 and A17G trajectories, calculated for the gREST trajectories at 310 K (A) and trajectories of the replica ID 1, visiting different temperatures (B).



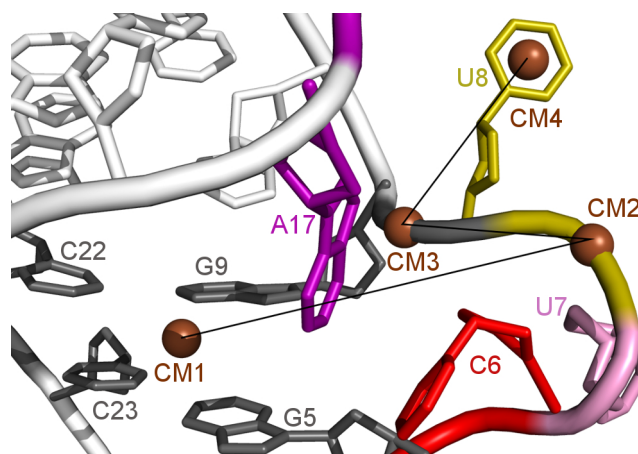

**Figure S11.** Definition of the pseudo-dihedral angle calculated to assess the flipping of bases. The dihedral angle was measured using four centers of masses, represented using configuration for U8 calculations. CM1 defines the center of mass of G5, G9, C22, C23 nucleobases, CM2 and CM3 are calculated for U8 and G9 phosphate group atoms, CM4 reflects U8 nucleobase center of mass.

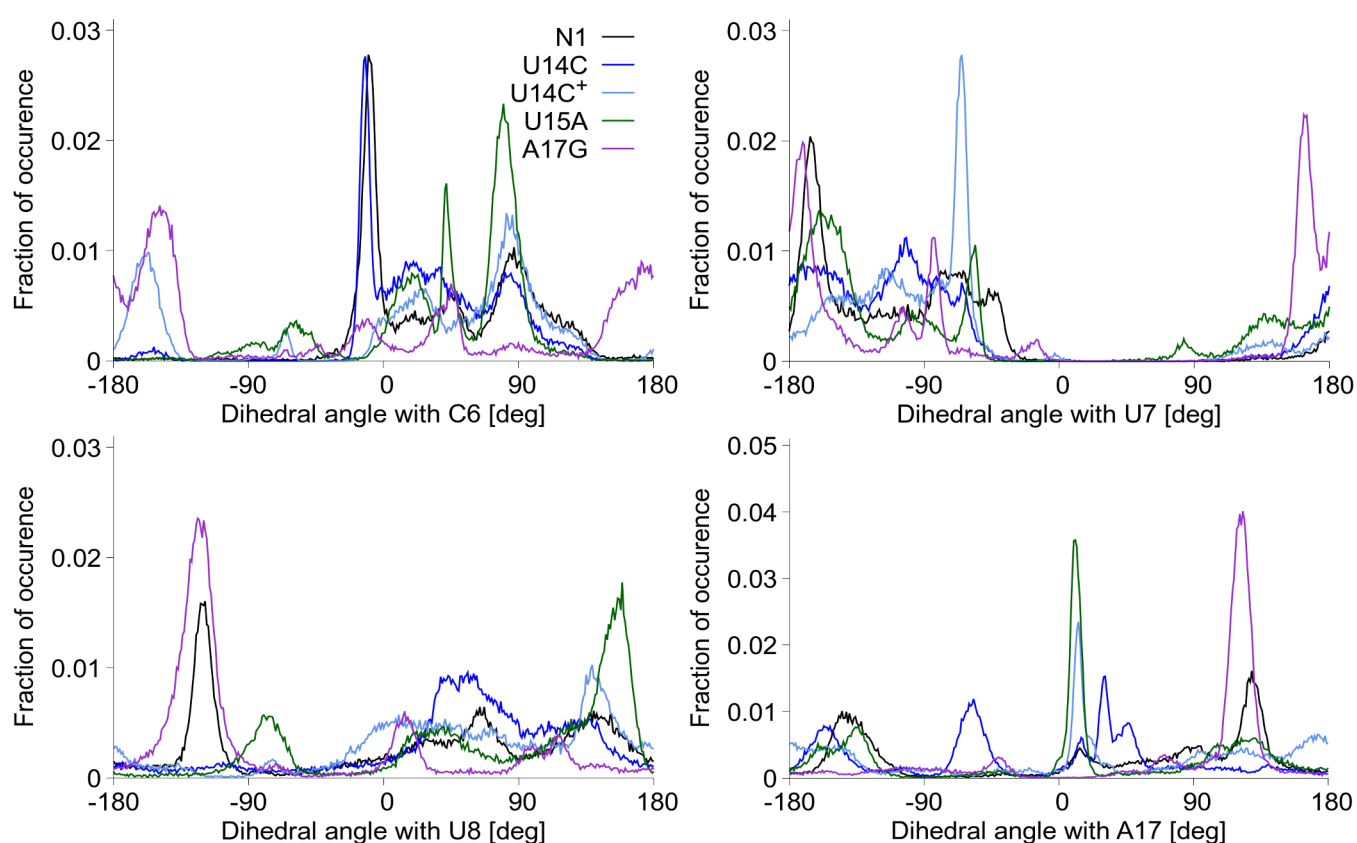

**Figure S12.** The distribution of pseudo-dihedral angles showing the flipping of nucleotides C6, U7, U8 and A17 in the unbound systems.

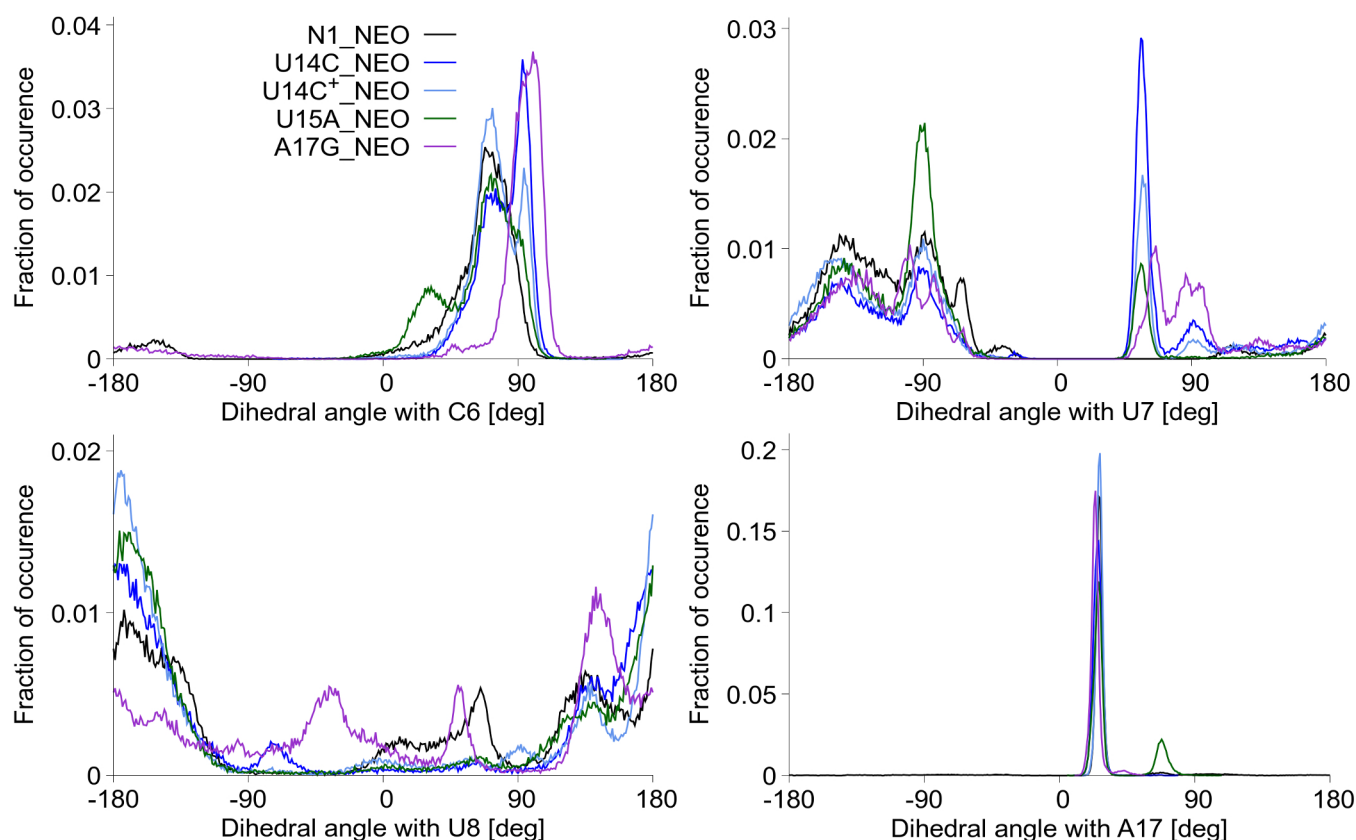

**Figure S13.** The distribution of dihedral angles showing the flipping of nucleotides C6, U7, U8 and A17 in the bound systems.

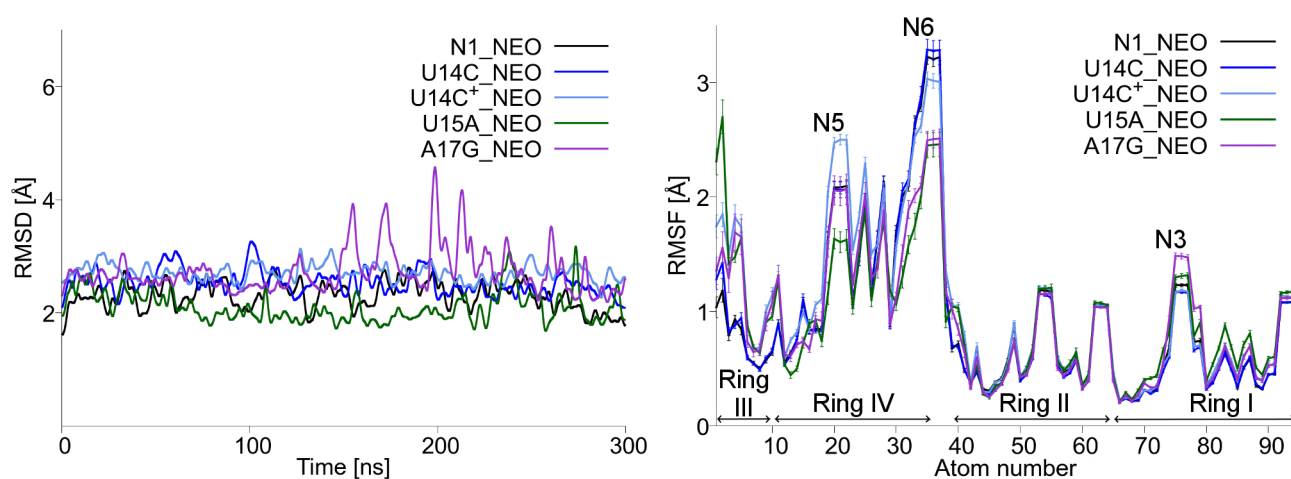

**Figure S14.** RMSD values for non-hydrogen atoms of neomycin after superimposing the RNA non-hydrogen atoms on the reference initial structure (left) and RMSF for the all atoms of neomycin with respect to the average structure. The gaussian\_filter1d method was used to smooth the data for RMSD calculations.

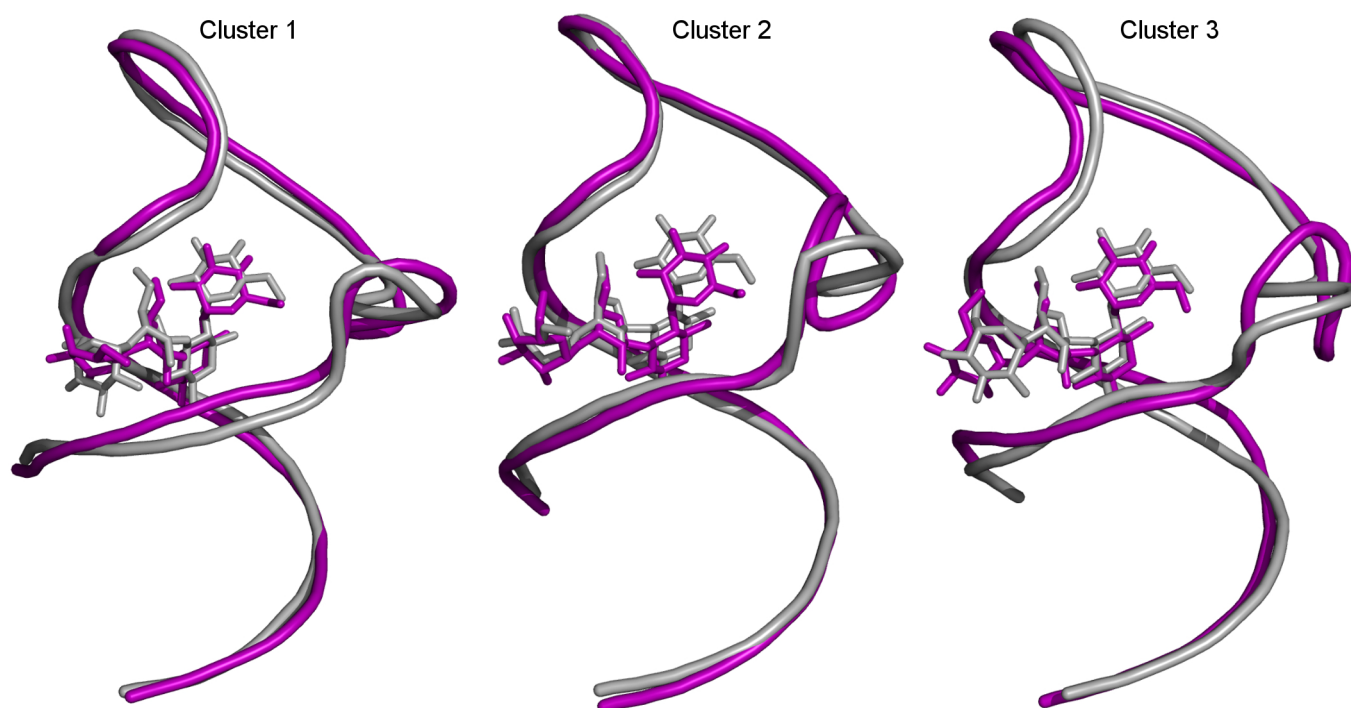

**Figure S15.** Three highly populated clusters from N1\_NEO (in gray) and A17G\_NEO (in purple) simulations with neomycin superimposed by phosphorus atoms.

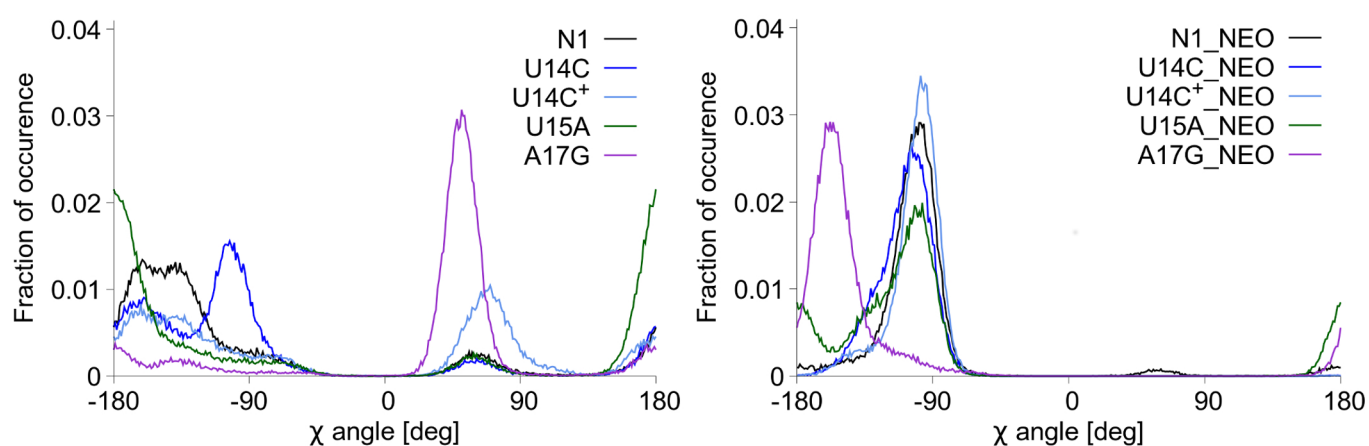

**Figure S16.** The  $\chi$  torsion angle distributions for A17/G17 in unbound (left) and bound (right) systems. The A17/G17 bases that sample the negative  $\chi$  torsion angles acquire the *anti* conformation and the positive angles denote the *syn* conformation.

Table S1. Simulations performed for the N1 riboswitch and its mutants in the NVT ensemble.

| System                 | MD               | gREST                                      |
|------------------------|------------------|--------------------------------------------|
| N1                     | 100 ns, 310.15 K | 8 replicas                                 |
| U14C                   |                  | 300 ns each, 310.15 – 370.00 K             |
| U14C <sup>+</sup>      |                  | Solute region: RNA + Counterions           |
| U15A                   |                  | Solute energy terms: Dihedral, Coulomb, LJ |
| A17G                   |                  |                                            |
| N1_NEO                 | 100 ns, 310.15 K | 8 replicas                                 |
| U14C_NEO               |                  | 300 ns each, 310.15 – 370.00 K             |
| U14C <sup>+</sup> _NEO |                  | Solute region: RNA + Counterions + NEO     |
| U15A_NEO               |                  | Solute energy terms: Dihedral, Coulomb, LJ |
| A17G_NEO               |                  |                                            |

Table S2. Overlap between the covariant matrices of the final fragments of the gREST trajectories: 250 – 275 ns and 275 – 300 ns, calculated with the Gromacs gmx anaeig tool. For the formulas for the normalized and shape overlaps, see the gmx anaeig manual.

| System                 | Normalized overlap | Shape overlap |
|------------------------|--------------------|---------------|
| N1                     | 0.66               | 0.66          |
| U14C                   | 0.62               | 0.62          |
| U14C <sup>+</sup>      | 0.60               | 0.61          |
| U15A                   | 0.60               | 0.60          |
| A17G                   | 0.70               | 0.70          |
| N1_NEO                 | 0.65               | 0.66          |
| U14C_NEO               | 0.69               | 0.69          |
| U14C <sup>+</sup> _NEO | 0.72               | 0.73          |
| U15A_NEO               | 0.66               | 0.67          |
| A17G_NEO               | 0.69               | 0.69          |

Table S3. Acceptance ratio of the exchanges between replicas in the gREST simulations.

|            |            | Acceptance ratio |          |                        |          |          |
|------------|------------|------------------|----------|------------------------|----------|----------|
| Replica ID | Replica ID | N1               | U14C     | U14C <sup>+</sup>      | U15A     | A17G     |
| 1          | 2          | 0.19             | 0.18     | 0.19                   | 0.19     | 0.17     |
| 2          | 3          | 0.20             | 0.20     | 0.20                   | 0.19     | 0.19     |
| 3          | 4          | 0.22             | 0.21     | 0.21                   | 0.21     | 0.21     |
| 4          | 5          | 0.23             | 0.23     | 0.23                   | 0.22     | 0.22     |
| 5          | 6          | 0.24             | 0.25     | 0.24                   | 0.23     | 0.24     |
| 6          | 7          | 0.25             | 0.26     | 0.26                   | 0.24     | 0.25     |
| 7          | 8          | 0.24             | 0.25     | 0.25                   | 0.25     | 0.22     |
| Replica ID | Replica ID | N1_NEO           | U14C_NEO | U14C <sup>+</sup> _NEO | U15A_NEO | A17G_NEO |
| 1          | 2          | 0.23             | 0.22     | 0.23                   | 0.22     | 0.22     |
| 2          | 3          | 0.24             | 0.24     | 0.24                   | 0.23     | 0.23     |
| 3          | 4          | 0.26             | 0.26     | 0.26                   | 0.25     | 0.25     |
| 4          | 5          | 0.27             | 0.27     | 0.28                   | 0.27     | 0.27     |
| 5          | 6          | 0.28             | 0.29     | 0.29                   | 0.28     | 0.29     |
| 6          | 7          | 0.30             | 0.30     | 0.31                   | 0.30     | 0.30     |
| 7          | 8          | 0.29             | 0.29     | 0.30                   | 0.29     | 0.29     |

**Table S4.** Percentage of Van der Waals interactions between two nucleobases in the simulations of riboswitches in the unbound state. The first 50 ns of the simulations were excluded from the analysis. Only the stacking interactions that appear in more than 25% of the analyzed trajectory in at least one system are shown. The following stacking interactions are stable (observed in at least 90% frames of analyzed part of trajectory): G2:C3, C3:U4, U4:G5, U4:G25, G5:G9, G5:A24, G9:U10, G9:C23, U10:C11, U10:C22, C11:C12, C11:U21, C12:G20, G19:G20, G20:U21, U21:C22, C22:C23, C23:A24, A24:G25, G25:U26, U26:C27. The nucleotide sequence is shown in Figure 1.

| Base 1 | Base 2 | Percentage of simulation time [%] |      |                   |      |      |
|--------|--------|-----------------------------------|------|-------------------|------|------|
|        |        | N1                                | U14C | U14C <sup>+</sup> | U15A | A17G |
| G1     | G2     | 95                                | 67   | 94                | 96   | 99   |
| G1     | C22    | 0                                 | 30   | 0                 | 0    | 0    |
| G2     | C27    | 94                                | 73   | 95                | 94   | 98   |
| C3     | U26    | 88                                | 86   | 87                | 87   | 94   |
| U4     | C6     | 13                                | 28   | 14                | 25   | 10   |
| G5     | C6     | 48                                | 56   | 24                | 38   | 16   |
| G5     | G25    | 38                                | 45   | 41                | 44   | 48   |
| C6     | U7     | 11                                | 1    | 0                 | 1    | 39   |
| C6     | U8     | 41                                | 49   | 52                | 24   | 14   |
| C6     | G9     | 13                                | 49   | 14                | 28   | 13   |
| C6     | A17    | 0                                 | 11   | 1                 | 34   | 7    |
| U7     | U8     | 4                                 | 4    | 2                 | 32   | 17   |
| U7     | A17    | 34                                | 2    | 10                | 2    | 65   |
| U8     | C12    | 0                                 | 0    | 1                 | 6    | 54   |
| G9     | A24    | 24                                | 20   | 31                | 40   | 39   |
| C12    | U13    | 100                               | 86   | 100               | 94   | 100  |
| U13    | U14    | 93                                | 83   | 93                | 73   | 92   |
| U13    | G19    | 98                                | 77   | 99                | 86   | 99   |
| U14    | U15    | 17                                | 25   | 12                | 30   | 28   |
| U14    | A16    | 47                                | 34   | 52                | 40   | 56   |
| U14    | U18    | 70                                | 38   | 75                | 55   | 62   |
| U14    | G19    | 23                                | 35   | 7                 | 3    | 13   |
| U15    | A16    | 68                                | 75   | 91                | 88   | 92   |
| A16    | A17    | 38                                | 57   | 43                | 8    | 3    |
| A16    | U18    | 58                                | 25   | 56                | 74   | 99   |
| A17    | U18    | 40                                | 28   | 23                | 44   | 2    |
| U18    | G19    | 92                                | 45   | 90                | 83   | 94   |

**Table S5.** Percentage of triple stacking interactions detected in the simulations of riboswitches in the unbound state. The first 50 ns of the simulations were excluded from the analysis. The nucleotide sequence is shown in Figure 1.

| Base 1 | Base 2 | Base 3 | Percentage of simulation time [%] |      |                   |      |      |
|--------|--------|--------|-----------------------------------|------|-------------------|------|------|
|        |        |        | N1                                | U14C | U14C <sup>+</sup> | U15A | A17G |
| C6     | U7     | A17    | 0                                 | 0    | 0                 | 0    | 25   |
| C6     | U8     | A17    | 3                                 | 2    | 9                 | 12   | 0    |

**Table S6.** Hydrogen bonds for analyzed RNA systems in the unbound state. The first 50 ns of the simulations were excluded from the analysis. Only the hydrogen bonds that appear in more than 25% of the analyzed trajectory in at least one system are shown. C12:N3–G19:N1 and C12:O2–G19:N2 hydrogen bonds are stable ( $\geq 90\%$ ). ' defines ribose atoms. \* indicates the hydrogen bonds in which an atom is changed as a result of mutation: proton in A17:C2 changes to NH<sub>2</sub>, N6 in A17 is replaced by O6. The nucleotide sequence is shown in Figure 1.

| Acceptor | Donor   | Percentage of simulation time [%] |      |                   |      |      |
|----------|---------|-----------------------------------|------|-------------------|------|------|
|          |         | N1                                | U14C | U14C <sup>+</sup> | U15A | A17G |
| G1:O6    | C27:N4  | 76                                | 53   | 76                | 75   | 79   |
| G2:O6    | U26:N3  | 53                                | 58   | 45                | 51   | 60   |
| C3:N3    | G25:N1  | 77                                | 76   | 74                | 78   | 88   |
| C3:O2    | G25:N2  | 82                                | 82   | 80                | 82   | 87   |
| U4:O4    | A24:N6  | 63                                | 68   | 71                | 55   | 62   |
| G5:O5'   | U4:O2'  | 20                                | 25   | 23                | 26   | 12   |
| G5:O6    | C23:N4  | 87                                | 84   | 87                | 89   | 89   |
| G5:OP2   | C6:N4   | 22                                | 23   | 28                | 37   | 9    |
| G5:OP2   | C6:O2'  | 33                                | 45   | 18                | 18   | 2    |
| U7:OP1   | U8:O2'  | 0                                 | 0    | 0                 | 29   | 0    |
| U8:O2'   | C11:N4  | 0                                 | 0    | 0                 | 1    | 52   |
| U8:OP1   | U7:O2'  | 11                                | 22   | 19                | 28   | 9    |
| G9:O6    | C22:N4  | 89                                | 88   | 85                | 87   | 88   |
| G9:OP1   | A17:N6* | 0                                 | 8    | 2                 | 34   | 0    |
| U10:O2   | U21:N3  | 22                                | 37   | 19                | 37   | 45   |
| U10:O4   | U21:N3  | 55                                | 31   | 53                | 20   | 17   |
| U10:OP2  | U8:O2'  | 0                                 | 4    | 0                 | 4    | 50   |
| C11:N3   | G20:N1  | 86                                | 84   | 89                | 83   | 89   |
| C11:O2   | G20:N2  | 86                                | 86   | 89                | 83   | 81   |
| U13:O2   | U18:N3  | 26                                | 11   | 42                | 43   | 18   |
| U13:O4   | U8:N3   | 0                                 | 0    | 0                 | 0    | 37   |
| U14:O5'  | U13:O2' | 14                                | 26   | 9                 | 5    | 10   |
| A16:O3'  | A17:C2* | 0                                 | 0    | 0                 | 0    | 37   |
| A16:N7   | U14:O2' | 5                                 | 0    | 33                | 12   | 9    |
| A17:O5'  | A16:O2' | 25                                | 11   | 12                | 21   | 26   |
| A17:OP2  | U14:N3  | 12                                | 0    | 63                | 39   | 38   |
| U18:O4   | U13:N3  | 58                                | 20   | 65                | 57   | 61   |
| G19:O6   | C12:N4  | 87                                | 82   | 89                | 84   | 86   |
| G20:O6   | C11:N4  | 80                                | 78   | 83                | 74   | 60   |
| U21:O2   | U10:N3  | 52                                | 28   | 48                | 18   | 16   |
| U21:O4   | U10:N3  | 31                                | 51   | 28                | 47   | 68   |
| C22:N3   | G9:N1   | 91                                | 87   | 87                | 91   | 93   |
| C22:O2   | G9:N2   | 89                                | 85   | 85                | 88   | 90   |
| C23:N3   | G5:N1   | 89                                | 90   | 93                | 93   | 95   |
| C23:O2   | G5:N2   | 91                                | 88   | 92                | 91   | 93   |
| A24:N1   | U4:N3   | 71                                | 74   | 78                | 60   | 67   |
| G25:O6   | C3:N4   | 71                                | 72   | 67                | 72   | 80   |
| U26:O2   | G2:N1   | 69                                | 68   | 65                | 68   | 75   |
| C27:N3   | G1:N1   | 82                                | 57   | 82                | 82   | 88   |
| C27:O2   | G1:N2   | 81                                | 56   | 80                | 81   | 86   |



**Table S7.** Percentage of Van der Waals interactions between two nucleobases in the simulations of riboswitches in complex with neomycin. The first 50 ns of the simulations were excluded from the analysis. Only the stacking interactions that appear in more than 25% of the analyzed trajectory in at least one system are shown. The following stacking interactions are stable (observed in at least 90% frames of analyzed part of trajectory): G1:G2, G2:C3, G2:C27, C3:U4, C3:U26, U4:G5, U4:G25, G5:G9, G5:A24, G9:U10, G9:C23, U10:C11, U10:C22, C11:C12, C11:U21, C12:U13, C12:G20, U13:G19, A16:U18, U18:G19, G19:G20, G20:U21, U21:C22, C22:C23, C23:A24, A24:G25, G25:U26, U26:C27. The nucleotide sequence is shown in Figure 1.

| Base 1 | Base 2 | Percentage of simulation time [%] |          |                        |          |          |
|--------|--------|-----------------------------------|----------|------------------------|----------|----------|
|        |        | N1_NEO                            | U14C_NEO | U14C <sup>+</sup> _NEO | U15A_NEO | A17G_NEO |
| G5     | G25    | 35                                | 37       | 34                     | 41       | 35       |
| C6     | U7     | 0                                 | 35       | 18                     | 10       | 25       |
| C6     | U8     | 27                                | 4        | 4                      | 10       | 7        |
| C6     | A17    | 87                                | 93       | 93                     | 93       | 82       |
| U7     | A17    | 0                                 | 9        | 5                      | 1        | 25       |
| U13    | U14    | 95                                | 83       | 100                    | 56       | 87       |
| U13    | A16    | 2                                 | 37       | 0                      | 41       | 13       |
| U14    | A16    | 47                                | 46       | 59                     | 39       | 42       |
| U14    | U18    | 89                                | 60       | 100                    | 55       | 83       |
| U15    | A16    | 95                                | 80       | 99                     | 90       | 89       |

**Table S8.** Hydrogen bonds for analyzed RNA systems in the bound state. The first 50 ns of the simulations were excluded from the analysis. Only the hydrogen bonds that appear in more than 25% of the analyzed trajectory in at least one system are shown. C3:N3–G25:N1, C3:O2–G25:N2, C11:N3–G20:N1, C12:N3–G19:N1, C12:O2–G19:N2, G19:O6–C12:N4, C22:O2–G9:N2, C22:N3–G9:N1, C23:N3–G5:N1, C23:O2–G5:N2, A24:N1–U4:N3 hydrogen bonds are stable ( $\geq 90\%$ ). ' defines ribose atoms. \* indicates the hydrogen bonds in which an atom is changed as a result of mutation: proton in A17:C2 changes to NH<sub>2</sub>, N6 in A17 is replaced by O6. The nucleotide sequence is shown in Figure 1.

| Acceptor | Donor   | Percentage of simulation time [%] |          |                        |          |          |
|----------|---------|-----------------------------------|----------|------------------------|----------|----------|
|          |         | N1_NEO                            | U14C_NEO | U14C <sup>+</sup> _NEO | U15A_NEO | A17G_NEO |
| G1:O6    | C27:N4  | 75                                | 73       | 76                     | 72       | 77       |
| G2:O6    | U26:N3  | 73                                | 74       | 74                     | 75       | 74       |
| U4:O4    | A24:N6  | 86                                | 82       | 84                     | 80       | 77       |
| G5:O2'   | A17:N6* | 70                                | 75       | 85                     | 57       | 1        |
| G5:O6    | C23:N4  | 82                                | 82       | 83                     | 80       | 81       |
| G5:OP1   | C6:N4   | 22                                | 26       | 18                     | 17       | 3        |
| G5:OP1   | A17:C2* | 0                                 | 0        | 0                      | 0        | 31       |
| G5:OP2   | C6:N4   | 32                                | 34       | 38                     | 37       | 8        |
| C6:N3    | A17:O2' | 20                                | 31       | 16                     | 25       | 28       |
| C6:O2    | A17:O2' | 27                                | 21       | 30                     | 21       | 11       |
| U7:OP1   | C6:O2'  | 32                                | 19       | 30                     | 21       | 4        |
| U8:OP1   | U7:O2'  | 28                                | 19       | 20                     | 21       | 18       |
| G9:O6    | C22:N4  | 83                                | 84       | 83                     | 83       | 86       |
| G9:OP1   | U8:O2'  | 23                                | 26       | 12                     | 19       | 13       |
| U10:O2   | U21:N3  | 56                                | 57       | 52                     | 57       | 52       |
| C11:O2   | G20:N2  | 89                                | 89       | 90                     | 89       | 90       |
| U13:O2   | U18:N3  | 63                                | 57       | 65                     | 70       | 84       |
| A16:N7   | U14:O2' | 23                                | 13       | 30                     | 11       | 38       |
| A17:O5'  | A16:O2' | 29                                | 5        | 9                      | 20       | 12       |
| A17:OP2  | U14:N3  | 70                                | 0        | 67                     | 46       | 62       |
| U18:O4   | U13:N3  | 77                                | 77       | 78                     | 84       | 84       |
| U18:OP1  | A16:O2' | 18                                | 26       | 50                     | 8        | 36       |
| G20:O6   | C11:N4  | 77                                | 76       | 78                     | 76       | 79       |
| U21:O4   | U10:N3  | 79                                | 80       | 82                     | 80       | 82       |
| G25:O6   | C3:N4   | 86                                | 87       | 87                     | 87       | 87       |
| U26:O2   | G2:N1   | 81                                | 81       | 81                     | 82       | 82       |
| C27:N3   | G1:N1   | 83                                | 82       | 84                     | 80       | 86       |
| C27:O2   | G1:N2   | 81                                | 81       | 83                     | 79       | 85       |

**Table S9.** Neomycin interactions with RNA. The first 50 ns of the simulations were excluded from the analysis. The percentage of occurrence of hydrogen bonds with ammonium groups in neomycin is calculated as a sum of hydrogen bonds with different protons. Only the hydrogen bonds that appear in more than 10% of the analyzed trajectory in at least one system are shown. \* indicates the hydrogen bonds in which an atom is changed as a result of mutation: N6 in A17 is replaced by O6. The nucleotide sequence and structure of neomycin are shown in Figure 1 and Figure S1, respectively.

| Acceptor | Donor   | Percentage of simulation time [%] |          |                        |          |          |
|----------|---------|-----------------------------------|----------|------------------------|----------|----------|
|          |         | N1_NEO                            | U14C_NEO | U14C <sup>+</sup> _NEO | U15A_NEO | A17G_NEO |
| C3:OP1   | NEO:O12 | 13                                | 10       | 10                     | 5        | 3        |
| C3:OP1   | NEO:O13 | 22                                | 16       | 19                     | 5        | 1        |
| U4:OP1   | NEO:O12 | 2                                 | 1        | 18                     | 1        | 3        |
| U4:OP2   | NEO:O10 | 7                                 | 8        | 5                      | 31       | 15       |
| U4:OP2   | NEO:O12 | 14                                | 10       | 15                     | 3        | 1        |
| U4:OP2   | NEO:N5  | 32                                | 41       | 20                     | 35       | 40       |
| G5:OP2   | NEO:O1  | 1                                 | 0        | 0                      | 18       | 0        |
| G5:OP2   | NEO:O10 | 50                                | 64       | 41                     | 41       | 57       |
| G9:OP1   | NEO:N3  | 38                                | 42       | 56                     | 57       | 37       |
| U10:O4   | NEO:N3  | 65                                | 65       | 67                     | 52       | 11       |
| A17:N6*  | NEO:N3  | 3                                 | 3        | 3                      | 2        | 55       |
| U18:OP2  | NEO:N6  | 9                                 | 6        | 6                      | 12       | 31       |
| G19:O6   | NEO:O8  | 65                                | 67       | 67                     | 62       | 64       |
| G19:OP1  | NEO:O12 | 2                                 | 3        | 3                      | 17       | 0        |
| G19:OP1  | NEO:O13 | 9                                 | 11       | 5                      | 20       | 30       |
| G19:OP2  | NEO:O1  | 89                                | 86       | 79                     | 64       | 85       |
| G19:OP2  | NEO:N6  | 18                                | 12       | 18                     | 12       | 36       |
| G19:N7   | NEO:N4  | 42                                | 39       | 40                     | 32       | 42       |
| G20:O6   | NEO:N2  | 46                                | 47       | 50                     | 43       | 48       |
| G20:N7   | NEO:N4  | 61                                | 57       | 54                     | 46       | 49       |
| U21:O4   | NEO:N2  | 42                                | 44       | 41                     | 46       | 43       |
